# Supplementary material for: Differential translation of mRNA isoforms underlies oncogenic activation of cell cycle kinase Aurora A
Source: eLife. 2023 Jun 29;12:RP87253. doi: 10.7554/eLife.87253 (PMC10328522; doi:10.7554/eLife.87253)
Supplement: Figure 1—source data 1. [file elife-87253-fig1-data1.xlsx]

## Sheet: 1B
NB (n=65)	TNBC (n=520)
0.76	2.64
0.81	1.81
0.93	1.22
1.03	2.21
0.8	1.5
0.82	0.95
0.79	1.42
0.65	1.24
1.06	2.47
0.73	1.55
0.84	1.35
0.6	1.64
0.65	1.32
0.66	3.39
0.81	1.76
0.83	2.82
0.65	2.83
0.68	1.63
0.6	3.27
0.63	2.92
0.67	1.04
0.61	2.1
0.64	1.91
0.79	0.92
0.67	3.7
0.93	3.06
1.07	2.52
0.63	1.83
0.62	1.43
0.67	3.51
0.63	1.61
0.64	2.35
0.62	2.02
0.91	2.2
0.92	1.05
0.61	2.6
0.79	3.72
0.6	1.43
0.68	1.23
0.63	1.82
0.77	0.75
0.65	2.71
0.63	1.56
0.92	1.59
0.66	3.17
0.69	1.52
0.93	2.39
0.74	1.16
0.66	1.46
0.66	2.7
0.66	2.37
1.11	0.87
0.89	1.33
0.99	1.53
1.05	3.12
0.88	1.5
0.88	1.55
0.86	1.18
1.34	3.38
1.57	1.6
1.45	1.57
1.14	1.44
0.96	2.86
0.84	3.38
0.67	3.2
	3.32
	3.75
	2.45
	2.8
	1.81
	3.06
	1.05
	1.37
	4.22
	3.18
	4.04
	3.4
	3.23
	3
	2.37
	0.95
	0.93
	0.99
	1.04
	0.86
	1.47
	0.92
	3.07
	1.34
	1.13
	0.86
	0.8
	0.68
	0.83
	1.33
	0.81
	1.34
	0.8
	0.86
	1.06
	1.29
	0.92
	1.34
	3.04
	3.2
	2.58
	2.59
	1.06
	1.23
	1.7
	0.94
	2.6
	2.12
	1.89
	2.39
	2.84
	0.91
	2.2
	0.79
	1.98
	2.7
	1.95
	1.97
	1.79
	0.79
	1.81
	2.17
	1.69
	1.98
	2.32
	2.08
	2.18
	2.58
	2.14
	2.76
	2.57
	1.11
	2.47
	2.7
	2.88
	1.23
	2.62
	2.25
	1.01
	2.72
	1
	1.77
	0.89
	2.21
	2.26
	1.82
	1.76
	1.2
	2.12
	1.12
	2.41
	0.81
	2.14
	2.62
	2.37
	2.04
	1.29
	3.57
	2.55
	1.63
	2.58
	2.04
	1.14
	1.86
	2.32
	2.18
	0.81
	1.29
	1.5
	1.2
	2.27
	2.71
	2.16
	1.82
	2.01
	2.52
	2.42
	2.31
	2.1
	0.99
	1.11
	1.4
	1.89
	2.19
	2.04
	2.3
	0.99
	3.55
	1.47
	2.09
	2.22
	2.62
	3.04
	1.76
	2.35
	1.95
	2.15
	2.58
	1.65
	1.63
	2.74
	2.48
	1.98
	2.59
	2.66
	2.42
	1.59
	2.74
	2.13
	0.86
	0.89
	1.59
	1.4
	2.22
	2.3
	2.29
	2.23
	2.83
	2.7
	1.24
	1.89
	2.45
	2.05
	1.66
	2.51
	2.17
	2.15
	2.04
	2.05
	3.11
	2.07
	2.67
	1.01
	2.23
	1.98
	2.47
	2.5
	2.03
	2.09
	2.66
	2.99
	2.71
	2.02
	2.2
	2.58
	1.95
	2.93
	1.13
	2.43
	2.47
	1.24
	2.63
	1
	0.96
	1.04
	1.01
	1.16
	1.05
	1.14
	2.09
	3.26
	2.78
	3.15
	2.06
	3.58
	3.53
	3
	2.18
	1.76
	0.92
	1.5
	1.02
	1.41
	1.91
	2.17
	2.21
	1.55
	1.52
	1.56
	1.47
	1.48
	1.58
	1.54
	3.31
	1.37
	0.9
	1.08
	1.33
	2.09
	1.24
	1.88
	1.98
	2.56
	1.76
	2.82
	1.83
	2.57
	2.36
	2.22
	2.25
	2.38
	2.15
	1.77
	2.5
	2.36
	2.1
	2.03
	2.25
	1.97
	2.35
	2.01
	2.46
	2.82
	2.17
	2.46
	2.27
	2.46
	2.53
	1.24
	2.07
	2.44
	1.6
	1.61
	2.75
	1.14
	1.85
	1.4
	1.82
	1.75
	3.36
	1.36
	1.7
	1.61
	0.97
	3.17
	0.72
	1.55
	2.91
	1.97
	0.77
	2.86
	2.4
	2.57
	0.77
	2.8
	2.09
	1
	0.84
	0.6
	2.02
	2.19
	2.82
	2.24
	0.73
	0.96
	1.04
	1.05
	2.24
	2.61
	1.01
	2.62
	1.43
	1.21
	2.14
	0.81
	2.83
	2.51
	1.13
	2.96
	0.71
	1.01
	1.07
	2.62
	1.91
	1.81
	2.52
	3.25
	4.28
	1.83
	2.34
	2.67
	2.63
	2.19
	2.82
	2.87
	2.55
	3.28
	2.67
	2.91
	0.88
	1.22
	2.34
	2.35
	2.5
	2.3
	2.07
	1.93
	1.86
	2.9
	1.96
	2.09
	2.92
	1.86
	1.84
	2.21
	1.78
	2.46
	2.52
	2.31
	1.76
	1.98
	2.04
	2.68
	1.86
	3.12
	2.92
	3.12
	3.07
	4.23
	1.97
	1.92
	2.2
	1.86
	1.62
	2.12
	1.35
	2.62
	1.85
	1.8
	2.14
	2.67
	1.79
	2.52
	2.21
	1.83
	2.03
	1.67
	1.07
	2.53
	2.25
	2.1
	1.56
	2.2
	2.22
	2.14
	2.42
	2.07
	2.37
	2.59
	1.3
	2.35
	2.1
	2.12
	0.95
	0.9
	1.95
	1.22
	2.21
	2.21
	3.15
	2.85
	2.23
	2.69
	1.75
	2.76
	2.15
	2.07
	1.79
	2.38
	2.92
	3.33
	3.06
	2.92
	2.4
	2.2
	2.78
	2.97
	3.08
	1.38
	2.79
	2.78
	3.03
	2.13
	2.65
	2.94
	3.61
	3.72
	3.1
	3.25
	3.34
	2.87
	3.01
	2.77
	2.38
	2.95
	2.58
	2.63
	2.94
	1.79
	3.37
	2.58
	2.96
	2.81
	2.13
	1.95
	2.69
	2.26
	2.51
	2.32
	2.27
	2.84
	2.5
	2.31
	2.39
	2.96

## Sheet: 1C
Normal breast	MCF10A	BT-20	HCC1143	HCC1937	MDA-MB-157	MDA-MB-231	MDA-MB-468
1	1.51737	3.46009	2.7275	3.26074	6.5465	4.07739	4.23082
1	1.29696	2.70166	3.36896	4.03674	6.90069	4.56385	4.81677
1	1.72852	3.89732	2.65766	3.4279	6.24697	3.81665	4.83214

## Sheet: 1D
Controls	TN1	TN2	TN3	TN4	TN5	TN6	TN7	TN8	TN9	TN10	TN11	TN12	TN13
1	3.07832	0.924713	3.72326	3.12246	3.75936	3.66216	7.11844	2.07517	1.56943	7.03339	2.50398	5.66151	1.96772
1	1.93964	1.02861	4.29074	2.8534	3.99395	3.69979	6.71128	2.23129	1.32969	4.55146	2.51458	3.23851	2.12688
1	2.59466	1.13728	3.34657	3.81764	2.89293	4.17123	9.67037	2.94759	0.927836	5.97714	3.75077	2.44807	2.07432

## Sheet: 1E
Months	High SLR (n=89)	Low SLR (n=81)
0	89	80
1	89
2		80
3	88	79
4
5
6	86
7	80
8	78
9		78
10	74	75
11	72	74
13	69	72
14	66
15	64	70
16	61	68
17	60	67
18	59	66
19	56	65
20
21	55
22	54
23	53	64
24	50
25	49	62
26		61
27	48	60
28	47
29	46	59
30		58
31	45	57
32
33
34		56
35
36	44	54
37	43	53
39
42		51
43
44	42	50
45		49
47	41
48	39
50	37
51		47
52
53		45
56		44
57	35
58	34
60	33
61	32
63		43
66		42
67
68
69	31
70	30
72
73		41
74	29
75		40
76		39
77	28
78	27
79		37
80	26
81		36
82	25
83
84	24
86		35
87	23	34
88	22	32
89		30
90		28
91
92		27
93	21
94
95	20	26
97	19
98		24
100		22
101		21
102	18
103
106	17	20
108	16	19
109	15
112
114	14	18
115	13
116	12	17
118		15
119
120	11	14
