# Supplementary material for: Differential translation of mRNA isoforms underlies oncogenic activation of cell cycle kinase Aurora A
Source: eLife. 2023 Jun 29;12:RP87253. doi: 10.7554/eLife.87253 (PMC10328522; doi:10.7554/eLife.87253)
Supplement: Figure 2—figure supplement 1—source data 1. [file elife-87253-fig2-figsupp1-data1.xlsx]

## Sheet: S1B
	mCherry	Venus
extr#1	23.5858	22.0263
extr#2	24.0572	22.7405
extr#3	22.5793	20.7499

## Sheet: S1C
	cell n1		cell n2		cell n3		cell n4		cell n5		cell n6		cell n7		cell n8
	Venus	mCherry	Venus	mCherry	Venus	mCherry	Venus	mCherry	Venus	mCherry	Venus	mCherry	Venus	mCherry	Venus	mCherry
0h	64262	392537	71982	752682	4411	46925	206407	3412500	8137	57189	10254	81113	365023	2051700	155387	585204
2h	70849	394394	60578	580042	5354	50771	180267	2802936	12325	46404	12336	62543	488743	1684237	245844	574884
4h	114946	358839	108569	589703	10241	52619	371935	3191426	9240	46411	10590	71032	412912	1810104	183439	543570
6h	99403	330098	104684	664569	10881	51971	364854	3441854	10771	55229	12829	76042	342611	1666210	179731	585895
8h	58145	324434	65610	682827	5319	44642	244098	3701943	11099	43467	22914	103355	460054	1736739	246553	607155
10h	61623	394163	43990	577428	6484	54704	200440	3844671	5246	33730	20037	109633	286378	1433429	241765	789547

## Sheet: S1D
Venus/mCherry
0.30907	G1
0.222715
0.155975
0.332931
0.43832
0.0427361
0.94003
0.259323
0.272117
0.206018
0.248254
0.0429811
0.699759
0.0671967
1.54465
0.760126
0.0358557
0.176838
0.088981
0.334987	S
0.291514
0.173516
0.160681
0.363126
0.127084
0.53608	G2
0.0982803
0.283065
1.5232
2.62685
0.0594825
0.241667
0.179107
0.379752
336230
0.287517
1.03208
0.241734
0.255888
0.402487
0.244386
0.149361
0.107637

## Sheet: S1E
	CDC6_S	CDC6_L
Exp1	0.590734	0.10955
Exp2	0.637229	0.192618
Exp3	0.697058	0.0599086
