# Supplementary material for: Differential translation of mRNA isoforms underlies oncogenic activation of cell cycle kinase Aurora A
Source: eLife. 2023 Jun 29;12:RP87253. doi: 10.7554/eLife.87253 (PMC10328522; doi:10.7554/eLife.87253)
Supplement: Figure 2—source data 2. [file elife-87253-fig2-data2.xlsx]

## Sheet: 2B
	∆	SHORT	LONG	WT
	Venus/mCherry	Venus/mCherry	Venus/mCherry	Venus/mCherry
EXP 1	0.284408	1.77963	0.931217	1.44605
EXP 2	0.287627	1.74595	0.940325	1.34368
EXP 3	0.549629	1.72323	0.755202	0.952664

## Sheet: 2D
	Total	Long
Exp1	1	0.735303
Exp2	1	0.536507
Exp3	1	0.685952

## Sheet: 2E
MCF10A					RPE1
	SHORT	LONG				LONG	SHORT
	Venus/mCherry	Venus/mCherry				Venus/mCherry	Venus/mCherry
Exp1	3.01904	1.05769			Exp1	0.562296	1.47429
Exp2	2.81411	0.853932			Exp2	0.562296	2.15802
					Exp3	0.481708	1.94283
