# Supplementary material for: Differential translation of mRNA isoforms underlies oncogenic activation of cell cycle kinase Aurora A
Source: eLife. 2023 Jun 29;12:RP87253. doi: 10.7554/eLife.87253 (PMC10328522; doi:10.7554/eLife.87253)
Supplement: Figure 3—source data 1. [file elife-87253-fig3-data1.xlsx]

## Sheet: 3A
Total levels
	∆	LONG	SHORT
Exp1	1.69837	0.902238	1.85497
Exp2	1.57451	0.803408	1.08273
Exp3	1.37	1.32504	1.46305

## Sheet: 3B
Decay rate
	∆			LONG			SHORT
	Exp1	Exp2	Exp3	Exp1	Exp2	Exp3	Exp1	Exp2	Exp3
0h	1	1	1	1	1	1	1	1	1
6h	1.01236	1	0.91555	0.746702	0.718894	0.768752	0.705479	0.661867	0.821288
12h	0.961781	1.01738	1.05258	0.63738	0.550904	0.663082	0.410369	0.488282	0.776442

## Sheet: 3C
Decay rate	Total			Long
	Experiment 1	Experiment 2	Experiment 3	Experiment 1	Experiment 2	Experiment 3
0	1	1	1	1	1	1
3	0.431813	0.384288	0.411884	0.378224	0.454376	0.40136
6	0.169567	0.142638	0.139207	0.115641	0.147898	0.112354

## Sheet: 3E
	Flag-L	Flag-S
	Venus/mCherry	Venus/mCherry
Exp1	1.36652	2.22678
Exp2	1.3038	2.14447

## Sheet: 3H
3XFlag						Puromycin
	Venus mRNA Elution/Input (%)						Venus mRNA Elution/Input (%)
	Flag-Δ	Flag-L	Flag-S				Flag-Δ	Flag-L	Flag-S
	0.1706	0.3627	0.6089				0.438685	0.85977	1.92846
