# Supplementary material for: Differential translation of mRNA isoforms underlies oncogenic activation of cell cycle kinase Aurora A
Source: eLife. 2023 Jun 29;12:RP87253. doi: 10.7554/eLife.87253 (PMC10328522; doi:10.7554/eLife.87253)
Supplement: Figure 4—figure supplement 1—source data 1. [file elife-87253-fig4-figsupp1-data1.xlsx]

## Sheet: S2B
	0h	2h DMSO
Exp1	0.00605256	0.0053832
Exp2	0.00689526	0.00947481

## Sheet: S2C
	TRIPS-L
	sfGFP 0h	mCherry 0h	sfGFP 2h	mCherry 2h
Exp1	14307.5	433545	366226	809467
Exp2	3020	294719	188184	1.28438e+06
Exp3	30826	2855232	346819	2726719

## Sheet: S2D
	TRIPS-S	TRIPS-L
	2h/0h	2h/0h
Exp1	25.627	8.45962
Exp2	34.2595	9.78054
