# Supplementary material for: Differential translation of mRNA isoforms underlies oncogenic activation of cell cycle kinase Aurora A
Source: eLife. 2023 Jun 29;12:RP87253. doi: 10.7554/eLife.87253 (PMC10328522; doi:10.7554/eLife.87253)
Supplement: Figure 4—source data 1. [file elife-87253-fig4-data1.xlsx]

## Sheet: 4B
	0h	2h +CHX		0h	2h -CHX
Exp1	0.019143	0.018814		0.0277572	0.0630943
Exp2	0.01946	0.01909		0.00781904	0.0326508
Exp3	0.026047	0.022183		0.0340698	0.109335

## Sheet: 4C
	sfGFP mRNA
	Exp1	Exp2	Exp3
0h	1	1	1
2h	0.846177	0.813524	0.880538

## Sheet: 4D
Left graph					Right graph
	TRIPS-S	TRIPS-L	TRIPS-∆			TRIPS-S				TRIPS-L				TRIPS-∆
Exp1	29.3274	14.2137	1.60085			individual 2h/0h sfGFP/mCherry values				individual 2h/0h sfGFP/mCherry values				individual 2h/0h sfGFP/mCherry values
Exp2	23.4246	10.2578	2.49155			< 0.8	0.8 - 1.1	> 1.1		< 0.8	0.8 - 1.1	> 1.1		< 0.8	0.8 - 1.1	> 1.1
Exp3	27.5148	9.6507	2.17791			2.32003	3.46999	8.06822		0.138955	0.33339	1.2424		0.0671578	0.0821121	3.35164e-05
						2.5431	4.9572	9.30662		0.28173	0.730469	5.42614		0.303143	0.308267	0.129483
						4.44712	6.17279	11.8632		0.383822	0.892996	6.02526		0.311689	0.482754	0.228836
						4.75645	8.26225	12.4213		0.388772	2.01602	6.41204		0.44671	0.562634	0.34854
						6.28046	10.8527	12.5744		0.566068	2.01602	8.52511		0.458356	0.73296	0.474386
						6.42968	13.5365	16.2508		0.593317	2.23217	8.88019		0.470484	1.01869	0.758443
						6.43299	13.9798	17.9948		0.626372	3.74884	9.16572		0.49309	1.02469	1.26347
						7.81133	15.3419	19.4377		0.783923	4.23589	9.91969		0.500272	1.32052	2.26489
						8.91227	15.4753	20.2532		0.972631	4.23589	10.0001		0.501737	1.51469	2.60612
						9.04077	17.9705	20.7177		1.00388	5.8998	10.0888		0.583458	1.53059	2.64175
						10.0307	18.189	22.0954		1.01137	7.27914	10.3533		0.589513	1.65167	2.87571
						10.0911	20.2119	22.2536		1.05987	7.46355	10.405		0.590493	1.81314	3.22863
						10.5551	22.9352	22.4382		1.28111	7.71433	10.4138		0.611898	2.15906	3.26328
						10.6925	23.7326	23.2023		1.38143	7.89234	10.739		0.637155	2.43529	3.9639
						11.1468	26.9415	23.2981		1.38143	9.50985	11.091		0.659816	2.44215	4.04139
						11.6946	27.1032	23.4654		1.46768	9.82822	12.9202		0.669256	2.5562
						12.3581	28.977	25.6709		1.60183	10.1378	12.994		0.812084	2.75297
						12.4078	29.024	25.7467		1.6253	10.9807	13.0073		0.90343	2.77297
						12.6101	29.4788	28.2549		1.70818	11.0611	13.7804		0.934656	3.07054
						12.6301	30.0501	30.3561		1.93476	11.5336	15.1289		1.02658	4.87228
						12.708	31.8514	36.0649		1.94001	11.5336	15.1477		1.06907	4.95869
						13.8052	33.5207	44.3733		2.07836	13.483	18.0095		1.13426	5.74043
						14.1603	34.5089	45.8154		2.3022	13.9011	19.0937		1.18794	5.88795
						14.4794	34.8587	50.2242		2.3088	17.965	20.4489		1.21396	8.60764
						14.9345	35.7823	58.3956		2.4484	20.7487	20.6508		1.24774
						15.0433	37.4501	58.9456		2.47101	24.5713	22.2137		1.3755
						15.5009	37.8094	107.627		2.5464	28.4851	22.7547		1.45591
						15.86	44.3049	152.369		2.97705	28.6894	23.2519		1.54448
						17.7033	45.2484	170.363		3.12959	30.647	26.1258		1.62844
						17.748	45.6198	190.178		3.22925	65.3223	26.7119		1.71058
						18.2756	48.5379			3.29298	67.4055	27.3601		1.71065
						18.3375	50.5025			3.59285		31.8585		1.72152
						18.7901	54.672			3.77718		33.1063		1.98628
						20.2229	56.023			4.61227		33.3095		2.11119
						20.5692	57.6665			4.86772		33.4976		2.16681
						20.6745	70.2701			4.86772		36.8075		2.18428
						20.9919	81.3962			5.18148		38.6305		2.27036
						21.4043	113.709			5.74876		39.8653		2.33902
						21.4787	167.127			6.10695		46.4784		2.34609
						21.6683	192.601			6.10695		48.9555		2.34902
						23.9041				6.82499		59.0411		2.52467
						24.4787				6.99658		84.4662		2.60397
						24.7641				7.11462		87.8998		2.67835
						25.8517				7.70748				2.7576
						27.497				8.26577				2.81354
						28.0072				8.38301				2.83038
						29.062				8.82163				2.89719
						29.3599				9.119				2.99148
						29.7192				9.1237				3.00336
						29.9618				10.3277				3.20046
						30.0371				10.4515				3.28639
						30.1831				10.5933				3.38944
						30.947				10.6286				3.58178
						32.4766				10.7046				3.86113
						32.9345				10.7962				3.89133
						33.7931				10.8525				4.08066
						33.8693				10.8525				4.64237
						34.2586				12.4168				4.66035
						34.2861				12.7167				4.82745
						34.5399				12.7167				5.51465
						34.9694				13.2587				5.79791
						35.8992				13.312				5.85298
						37.7609				13.6528				5.90709
						38.237				13.6952				6.09717
						38.5287				13.8961				6.30654
						38.5497				13.9877				6.58512
						38.8765				14.218				7.46152
						41.9681				14.5378				7.76469
						42.0168				14.5378				9.69505
						44.3923				14.5576				10.2997
						45.025				14.5576				10.5495
						48.9687				14.6912				14.4579
						52.4989				15.4604				14.4751
						53.9248				16.4832				15.7056
						56.535				19.6155				22.8046
						58.0634				19.6155				72.641
						59.3352				19.9216
						60.5158				20.3741
						61.7332				20.6726
						62.2956				20.9743
						65.0588				20.9743
						65.1848				22.4459
						65.2433				25.7152
						65.6421				28.084
						65.6952				32.3192
						65.9076				40.3006
						67.7369				42.7921
						67.9415				48.8662
						70.4842				48.8662
						94.1389				51.6301
						94.1892				53.7172
						102.072				75.8357
						107.934				132.097
						118.003
						260.044
						264.224
						284.335
						388.251

## Sheet: 4E
	Total AURKA mRNA
	Thym.	RO	STLC
Exp1	9.39434e-05	0.000384	0.000587
Exp2	8.78707e-05	0.000342	0.00119
Exp3	0.000366	0.000525	0.001427

## Sheet: 4F
	Long/Total AURKA mRNA (%)
	Thym.	RO	STLC
Exp1	51.9056	84.8646	71.9809
Exp2	50.0218	57.7739	98.8863
Exp3	87.013	85.7986	85.8419
