# Supplementary material for: Differential translation of mRNA isoforms underlies oncogenic activation of cell cycle kinase Aurora A
Source: eLife. 2023 Jun 29;12:RP87253. doi: 10.7554/eLife.87253 (PMC10328522; doi:10.7554/eLife.87253)
Supplement: Figure 5—source data 1. [file elife-87253-fig5-data1.xlsx]

## Sheet: 5B
	SHORT + NC	SHORT + let7a	LONG + NC	LONG + let7a	∆let7a + NC	∆let7a + let7a	MZF1 + NC	MZF1 + let7a
Experiment 1	1.22608	1.24651	0.435956	0.181411	1.38337	1.53115	1.38031	1.203
Experiment 2	1.18242	1.27896	0.404708	0.154573	1.39818	1.33988	2.79412	1.72019
Experiment 3	1.2679	1.15906	0.573651	0.27929	2.75376	2.34361	3.28931	1.00943

## Sheet: 5C
	LONG + NC	LONG + anti-let7a
Exp 1	0.589759	3.71682
Exp 2	0.633875	2.38123
Exp 3	0.853768	2.47109

## Sheet: 5D
	SHORT + NC	SHORT + let7a	LONG + NC	LONG + let7a	∆let7a + NC	∆let7a + let7a
Exp 1	87.8993	63.9203	57.9035	41.7573	85.9381	107.66
Exp 2	76.4724	74.3025	77.4648	46.3337	100.274	80.9387
Exp 3	82.7887	92.9503	77.6471	30.0845	107.974	90.0962

## Sheet: 5E
Left graph		TRIPS-L					Right graph	TRIPS-L											TRIPS-∆let7a
		+ NC	+ let7a	+ anti-let7a	TRIPS-∆let7a			+ NC				+ let7a				+ anti-let7a
	Exp 1	8.36244	2.04831	18.0476	19.5292			individual 2h/0h sfGFP/mCherry values				individual 2h/0h sfGFP/mCherry values				individual 2h/0h sfGFP/mCherry values			individual 2h/0h sfGFP/mCherry values
	Exp 2	6.89683	2.7092	17.4662	16.2595			< 0.8	0.8 - 1.1	> 1.1		< 0.8	0.8 - 1.1	> 1.1		< 0.8	0.8 - 1.1	> 1.1	< 0.8	0.8 - 1.1	> 1.1
	Exp 3	13.2599	2.39742	14.538	29.2297			9.22685	0.667567	18.3172		0.271999	0.529664	0.388549		36.5318	37.4791	4.91708	19.5674	66.585	85.9328
								4.27936	6.69781	8.46842		0.571301	0.242566	0.410024		10.7021	17.3016	14.8955	20.8572	19.6108	52.6371
								2.83836	4.11203	3.79529		0.244353	0.481937	0.280258		33.4518	18.0499	71.43	50.5635	12.9909	18.2629
								15.5166	2.56652	20.1086		0.863244	0.348436	0.43888		31.9468	17.5052	68.9582	22.0125	88.1208	37.5867
								14.5658	13.612	11.6418		0.273202	0.372453	0.667282		20.283	12.3011	22.6737	50.4698	20.277	23.07
								2.7334	58.1824	42.1966		0.954513	0.524418	0.339902		10.6987	17.8287	8.64665	69.0895	24.7651	31.6389
								6.91743	25.7098	27.9018		0.011248	0.342741	0.513219		37.3506	52.2548	9.1886	62.1894	16.9681	24.6633
								0.660462	7.08047	11.2663		-0.85112	0.58527	0.422223		26.9639	19.9098	9.98803	12.9878	16.0972	27.1868
								1.53905	5.88229	126.055		0.244146	0.28925	0.682211		36.0907	10.6128	22.5254	22.5165	41.2548	21.614
								3.32516	3.0679	50.6255		0.263066	0.475664	0.446926		34.5301	8.20641	27.8185	21.8171	21.3627	89.1259
								20.2726	24.6961	9.99433		0.210875	0.447667	0.429119		9.74622	15.8249	26.7601	10.3722	17.2578	66.7914
								4.92169	25.2666	5.48136		0.277916	0.843502	0.541782		8.08667	12.8302	10.0438	26.1816	49.8455	13.4793
								4.2551	34.8894	14.9825		0.193084	0.200325	0.772366		8.6816	11.2557	17.8416	20.442	30.9875	1.3499
								15.2048	28.9695	17.8486		0.10381	0.684688	0.296446		113.29	10.7445	16.6552	37.9284	22.4969	4.21494
								10.5478	25.2672	18.9491		0.395674	0.27001	0.435556		22.9115	4.58808	18.1555	22.4708	49.2732	9.43504
								4.68403	9.13508	24.5237		0.0958247	0.512885	0.116315		18.9169	17.1176	21.1167	38.0546	45.3556	0.335752
								1.79077	21.2676	32.4245		0.363004	0.334207	0.864353		17.3037	21.1221	19.8886	40.4186	28.2409	31.1457
								1.84508	20.3902	41.6825		0.128465	0.607963	0.234034		6.80053	6.58064	27.0999	19.8338	10.5338	8.62071
								4.67151	7.28497	39.4758		1.45476	0.270417	0.0648742		46.9388	31.0158	14.9962	18.6731	19.7474	37.3708
								22.1993	6.83631	21.8897		0.207452	0.813925			13.9067	24.0082	13.3563	2.94975	29.826	0.449528
								9.11274	13.4301	35.948		0.171945	0.420857			6.83395	30.4776	16.4466	26.0804	9.39491	0.935182
								9.61772	5.60725	33.0748		0.420765	0.193275			8.96491	4.69787	27.6973	8.17471	11.1066	9.45182
								2.63139	17.0019	36.3688		0.21098	0.160443			39.6387	24.8256	27.8938	5.80701	2.81932	16.4411
								5.38803	8.9503	19.8694		0.802391	0.0786961			16.9901	5.62019	8.37541	31.4883	0.731689	9.58441
								6.86958	2.36818	14.6263		0.14113				18.7502	97.4659	43.327	1.84718	7.11183	25.9787
								0.994463	9.78817	33.8297		0.561573				5.85327	23.6578	10.3689	24.0622	1.01154	7.86282
								15.5179	5.52279	11.6417		0.263589				19.6932	1.49725	22.5568	21.2195	14.5873	1.79856
								18.5817	9.51792	30.3351		0.445591				22.0437	112.716	32.8533	1.25235	1.77992	25.4981
								0.216392	7.12995	2.15892		0.930572				14.5372	10.6734	21.2357	8.69396	16.2592	8.18119
								12.3991	1.72305	73.4478		0.0971491				8.04758	20.0444	19.461	1.91624	18.8777	9.35061
								6.58396	5.54919	2.23027		0.834811				6.8545	14.1133	6.4667	7.65783	9.09686	17.0032
								0.248813	5.08179	4.53992		0.0680821				22.2238		4.87826	3.00516	5.28531	15.411
								2.87997	0.668171	17.1656		0.483934				15.8451		6.12415	15.1609	39.3611	0.206658
								50.7381	24.1095	3.39696		0.250246				12.0941		3.98554	28.5611	2.05682	44.0142
								5.64962	2.2909	6.13665		0.122098				56.3773		19.0972	2.00807	7.98615	15.0266
								30.921	1.51241	20.6018		0.0467746				5.61911		25.1396	34.4162	0.986913	1.67499
								24.6084	50.6661	13.9667		0.168858				6.96426		38.9768	11.3689	15.9122
								9.99632	232.578			0.0772628				7.38703		31.1605	26.3076
								25.9151	20.6268			0.188183				10.6823		12.7625	9.15258
								2.72568	1.09743			0.174678				10.821			16.5111
								39.135	4.03766			0.0912041				12.7664			10.0153
								32.2438	8.4145			0.311589				29.0661			37.6518
								21.1459	1.81638			0.00129315				67.3215			2.90559
								16.9051				0.190269				6.80486			3.60577
								0.271075				0.0573397				12.6949			12.013
								2.48954				0.0895937				64.4174			17.6579
								10.7199				0.107857				2.6646			2.15443
								9.96186				0.0543011				17.9236			29.8291
								4.63064				0.479208				4.91145			9.82661
								3.47056				0.0466721				13.55			13.0593
								10.3485				0.0921479				2.96785			1.73188
								1.0515				0.134223				13.8637			6.29663
								47.9715								35.665			5.37015
								2.1287								18.0343			3.904
								1.913								19.6659			41.7675
								17.4805											1.23512
								2.47432
								23.6086
								0.488312
								1.14349
								1.21909
								17.334
								1.81614
								14.3679
								12.3897
								11.5627
								20.6417
								3.38076
								47.0327
								4.4214
								33.8698
								2.91249
								9.93856
								13.4269
								0.958951
								31.8238
								7.48607
								5.42644
								7.40453
								16.0474
								3.99775
								0.385738
								0.931638
								1.60753
								57.0292
								1.87648
								2.87556
								1.4628
								1.49205
								6.1505
								9.93825
								4.04405
								33.4018
								11.1727
								3.88801
								19.8244
								2.76872
								22.913
								30.8382
								3.42864
