# Supplementary material for: Differential translation of mRNA isoforms underlies oncogenic activation of cell cycle kinase Aurora A
Source: eLife. 2023 Jun 29;12:RP87253. doi: 10.7554/eLife.87253 (PMC10328522; doi:10.7554/eLife.87253)
Supplement: Figure 6—source data 2. [file elife-87253-fig6-data2.xlsx]

## Sheet: 6E
	Absorbance vs 0h
	WT			∆dPAS#1			∆dPAS#2			Neg. clone
	Exp 1	Exp 2	Exp 3	Exp 1	Exp 2	Exp 3	Exp 1	Exp 2	Exp 3	Exp 1	Exp 2	Exp 3
0h	1	1	1	1	1	1	1	1	1	1	1	1
24h	2.38248	1.66721	1.96562	2.50649	2.4911	2.45683	2.02249	2.35878	2.52103	1.88007	2.34432	1.79172
48h	4.18248	4.00969	3.02093	5.18903	4.52967	5.247	3.68122	5.0855	4.89252	3.94004	3.5486	3.13793
72h	6.85547	6.79645	6.82212	14.1429	11.1647	11.2614	10.3399	10.0427	10.1343	7.56085	7.69852	6.70897

## Sheet: 6F
		n of colonies
		field 1	field 2	field 3	field 4	mean
Exp1	WT	79	92	85	77	83.25
	∆dPAS#2	152	165	148	167	158
	∆dPAS#1	159	183	177	192	177.75
Exp2	WT	68	66	59	52	61.25
	∆dPAS#2	132	125	116	141	128.5
	∆dPAS#1	101	139	158	142	135
Exp3	WT	75	69	92	87	80.75
	∆dPAS#2	137	145	132	159	143.25
	∆dPAS#1	98	151	147	132	132

## Sheet: 6G
	WT 0h	WT 24h	WT 32h		∆dPAS#1 0h	∆dPAS#1 24h	∆dPAS#1 32h		∆dPAS#2 0h	∆dPAS#2 24h	∆dPAS#2 32h
Exp 1	57.9237	36.6183	17.2463		52.5933	30.2093	7.74167		52.8853	32.0397	7.19433
Exp2	55.8007	36.04	16.529		56.725	23.1423	9.26467		53.0187	22.914	13.8743
Exp 3	55.0237	36.8883	17.1673		54.963	20.1437	3.05067		53.6893	21.2453	13.9373
