# Supplementary material for: Differential translation of mRNA isoforms underlies oncogenic activation of cell cycle kinase Aurora A
Source: eLife. 2023 Jun 29;12:RP87253. doi: 10.7554/eLife.87253 (PMC10328522; doi:10.7554/eLife.87253)
Supplement: Supplementary file 1. [file elife-87253-supp1.xlsx]

## Sheet: Sheet1
ITEM TO CHECK	IMPORTANCE	CHECKLIST	NOTES
EXPERIMENTAL DESIGN
Definition of experimental and control groups	E	YES	Methods
Number within each group	E	YES	Methods
Assay carried out by core lab or investigator's lab?	D	YES	Investigator's lab
Acknowledgement of authors' contributions	D	YES	HBA and TT performed RTqPCR experiments in Fig.1. RC performed all other RTqPCR experiments
SAMPLE
Description	E	YES	Cell culture
Volume/mass of sample processed	D	YES	70-90% confluent 6-well plates
Microdissection or macrodissection	E	N/A
Processing procedure	E	N/A
If frozen - how and how quickly?	E	N/A
If fixed - with what, how quickly?	E	N/A
Sample storage conditions and duration (especially for FFPE samples)	E	N/A
NUCLEIC ACID EXTRACTION
Procedure and/or instrumentation	E	YES	Methods
Name of kit and details of any modifications	E	YES	Methods
Source of additional reagents used	D	N/A
Details of DNase or RNAse treatment	E	YES	Methods
Contamination assessment (DNA or RNA)	E	YES	Appendix 1
Nucleic acid quantification	E	YES	Methods
Instrument and method	E	YES	Methods
Purity (A260/A280)	D	YES	Methods
Yield	D	YES	0.1-1 µg/µl
RNA integrity method/instrument	E	YES	Methods
RIN/RQI or Cq of 3' and 5' transcripts	E	NO
Electrophoresis traces	D	NO
Inhibition testing (Cq dilutions, spike or other)	E	NO
REVERSE TRANSCRIPTION
Complete reaction conditions	E	YES	Appendix 1
Amount of RNA and reaction volume	E	YES	Appendix 1
Priming oligonucleotide (if using GSP) and concentration	E	YES	Appendix 1
Reverse transcriptase and concentration	E	N/A	One-step RT-qPCR
Temperature and time	E	YES	Appendix 1
Manufacturer of reagents and catalogue numbers	D	YES	Methods/Appendix 1
Cqs with and without RT	D	N/A	One-step RT-qPCR
Storage conditions of cDNA	D	N/A	One-step RT-qPCR
qPCR TARGET INFORMATION
If multiplex, efficiency and LOD of each assay.	E	N/A
Sequence accession number	E	YES	Appendix 1
Location of amplicon	D	YES	Appendix 1
Amplicon length	E	YES	Appendix 1
In silico specificity screen (BLAST, etc)	E	YES	Appendix 1
Pseudogenes, retropseudogenes or other homologs?	D	NO
Sequence alignment	D	NO
Secondary structure analysis of amplicon	D	NO
Location of each primer by exon or intron (if applicable)	E	YES	Appendix 1
What splice variants are targeted?	E	YES	Appendix 1
qPCR OLIGONUCLEOTIDES
Primer sequences	E	YES	Appendix 1
RTPrimerDB Identification Number	D	N/A
Probe sequences	D	N/A
Location and identity of any modifications	E	N/A
Manufacturer of oligonucleotides	D	YES	Sigma
Purification method	D	YES	Desalt
qPCR PROTOCOL
Complete reaction conditions	E	YES	Appendix 1
Reaction volume and amount of cDNA/DNA	E	N/A	One-step RT-qPCR
Primer, (probe), Mg++ and dNTP concentrations	E	N/A	Manufacturer's property
Polymerase identity and concentration	E	N/A	Manufacturer's property
Buffer/kit identity and manufacturer	E	YES	Methods
Exact chemical constitution of the buffer	D	N/A	Manufacturer's property
Additives (SYBR Green I, DMSO, etc.)	E	N/A	Manufacturer's property
Manufacturer of plates/tubes and catalog number	D	YES	Appendix 1
Complete thermocycling parameters	E	YES	Appendix 1
Reaction setup (manual/robotic)	D	YES	Manual
Manufacturer of qPCR instrument	E	YES	Methods
qPCR VALIDATION
Evidence of optimisation (from gradients)	D	NO
Specificity (gel, sequence, melt, or digest)	E	YES	Appendix 1
For SYBR Green I, Cq of the NTC	E	YES	Appendix 1
Standard curves with slope and y-intercept	E	YES	Appendix 1
PCR efficiency calculated from slope	E	YES	Appendix 1
Confidence interval for PCR efficiency or standard error	D	NO
r2 of standard curve	E	YES	Appendix 1
Linear dynamic range	E	NO
Cq variation at lower limit	E	NO
Confidence intervals throughout range	D	NO
Evidence for limit of detection	E	NO
If multiplex, efficiency and LOD of each assay.	E	N/A
DATA ANALYSIS
qPCR analysis program (source, version)	E	YES	Methods
Cq method determination	E	YES	Methods
Outlier identification and disposition	E	N/A
Results of NTCs	E	YES	Appendix 1
Justification of number and choice of reference genes	E	YES	mCherry: see Figure 2; 18S and SDHA: renowned for having invariant expression across tissues, cells, and experimental treatments
Description of normalisation method	E	YES	Methods/Figure legends
Number and concordance of biological replicates	D	YES	Methods
Number and stage (RT or qPCR) of technical replicates	E	YES	Methods
Repeatability (intra-assay variation)	E	NO
Reproducibility (inter-assay variation, %CV)	D	YES	Figure legends
Power analysis	D	NO
Statistical methods for result significance	E	YES	Figure legends
Software (source, version)	E	YES	Methods
Cq or raw data submission using RDML	D	NO	Source data submitted as xlsx file
E, essential. D, desirable.
